# Supplementary material for: Chronic toxicity of shrimp feed added with silver nanoparticles (Argovit-4®) in Litopenaeus vannamei and immune response to white spot syndrome virus infection
Source: PeerJ. 2022 Nov 22;10:e14231. doi: 10.7717/peerj.14231 (PMC9695493; doi:10.7717/peerj.14231)
Supplement: File S1 — Mortality was recorded in each replicate from treatments every 12 hours for ten days. The cumulative mortality at the end of the experiment was normalized by arcsine function and analyzed by one-way ANOVA and a Tukey test using the Statistic program (STATISTICA 7.0). [file peerj-10-14231-s001.xlsx]

## Sheet: CUMULATIVE SURVIVAL
																BIOASSAYS: AgNP Feed agaisnt WSSV
				Time	D1						D4						D7						Ctrl +						Ctrl -
		dpi		hrs	R1	R2	R3	Sume	% Mort	Cum mort (%)	R1	R2	R3	Sume	% Mort	Cum mort (%)	R1	R2	R3	Sume	% Mort	Cum mort (%)	R1	R2	R3	Sume	% Mort	Cum mort (%)	R1	R2	R3	Sume	% Mort	Cum mort (%)
		1	10:00 p.m.	0	0	0	0	0	0	0	0	0	0	0	0	0	0	0	0	0	0	0	0	0	0	0	0	0	0	0	0	0	0	0
			10:00 a.m.	12	0	0	0	0	0	0	0	0	0	0	0	0	0	0	0	0	0	0	0	0	0	0	0	0	0	0	0	0	0	0
			10:00 p.m.	24	0	0	0	0	0	0	0	0	0	0	0	0	0	0	0	0	0	0	0	0	0	0	0	0	0	0	0	0	0	0
		2	10:00 a.m.	36	0	0	0	0	0	0	0	0	0	0	0	0	0	0	0	0	0	0	0	0	0	0	0	0	0	0	0	0	0	0
			10:00 p.m.	48	0	0	0	0	0	0	1	0	0	1	3.33333	3.33333	0	0	0	0	0	0	1	1	1	3	10	10	0	0	0	0	0	0
		3	10:00 a.m.	60	1	2	3	6	20	20	1	1	1	3	10	13.3333	2	2	2	6	20	20	1	1	1	3	10	20	0	0	0	0	0	0
			10:00 p.m.	72	2	1	1	4	13.3333	33.3333	1	1	1	3	10	23.3333	0	0	0	0	0	20	0	0	0	0	0	20	0	0	0	0	0	0
		4	10:00 a.m.	84	1	1	1	3	10	43.3333	1	1	2	4	13.3333	36.6667	0	1	1	2	6.66667	26.6667	1	1	1	3	10	30	0	0	0	0	0	0
			10:00 p.m.	96	1	1	0	2	6.66667	50	0	1	0	1	3.33333	40	0	1	0	1	3.33333	30	1	1	1	3	10	40	0	0	0	0	0	0
		5	10:00 a.m.	108	0	0	1	1	3.33333	53.3333	0	0	0	0	0	40	0	0	0	0	0	30	1	0	1	2	6.66667	46.6667	0	0	0	0	0	0
			10:00 p.m.	120	1	1	1	3	10	63.3333	0	1	0	1	3.33333	43.3333	1	0	0	1	3.33333	33.3333	1	1	1	3	10	56.6667	0	0	0	0	0	0
		6	10:00 a.m.	132	1	0	1	2	6.66667	70	1	1	2	4	13.3333	56.6667	0	0	1	1	3.33333	36.6667	1	1	0	2	6.66667	63.3333	0	0	0	0	0	0
			10:00 p.m.	144	0	1	0	1	3.33333	73.3333	0	1	0	1	3.33333	60	0	1	0	1	3.33333	40	0	2	0	2	6.66667	70	0	0	0	0	0	0
		7	10:00 a.m.	156	0	0	0	0	0	73.3333	0	0	0	0	0	60	1	0	0	1	3.33333	43.3333	1	0	1	2	6.66667	76.6667	0	0	0	0	0	0
			10:00 p.m.	168	0	0	0	0	0	73.3333	1	0	0	1	3.33333	63.3333	0	0	0	0	0	43.3333	0	1	2	3	10	86.6667	0	0	0	0	0	0
		8	10:00 a.m.	180	1	1	0	2	6.66667	80	1	0	0	1	3.33333	66.6667	1	0	1	2	6.66667	50	0	0	0	0	0	86.6667	0	0	0	0	0	0
			10:00 p.m.	192	1	0	0	1	3.33333	83.3333	1	0	0	1	3.33333	70	0	0	0	0	0	50	1	0	0	1	3.33333	90	0	0	0	0	0	0
		9	10:00 a.m.	204	0	0	1	1	3.33333	86.6667	0	0	0	0	0	70	0	0	0	0	0	50	0	0	0	0	0	90	0	0	0	0	0	0
			10:00 p.m.	216	0	1	0	1	3.33333	90	0	0	0	0	0	70	0	0	1	1	3.33333	53.3333	0	0	0	0	0	90	0	0	0	0	0	0
		10	10:00 a.m.	228	0	0	0	0	0	90	0	0	0	0	0	70	0	0	0	0	0	53.3333	0	1	0	1	3.33333	93.3333	0	0	0	0	0	0
			10:00 p.m.	240	0	1	0	1	3.33333	93.3333	0	0	0	0	0	70	0	0	0	0	0	53.3333	0	0	0	0	0	93.3333	0	0	0	0	0	0
				Σ	9	10	9	28	93.3333		8	7	6	21	70		5	5	6	16	53.3333		9	10	9	28	93.3333		0	0	0	0	0
			The experimental design considered n = 10 individuals per replicate
					Hpi	Mortality (%) D1			Average	SD	Hpi	Mortality (%) D4			Average	SD	Hpi	Mortality (%) D7			Average	SD	Hpi	Mortality (%) Positive control			Average	SD	Hpi	Mortality (%) Negative control			Average	SD
					0	0	0	0	0	0	0	0	0	0	0	0	0	0	0	0	0	0	0	0	0	0	0	0	0	0	0	0	0	0
					12	0	0	0	0	0	12	0	0	0	0	0	12	0	0	0	0	0	12	0	0	0	0	0	12	0	0	0	0	0
					24	0	0	0	0	0	24	0	0	0	0	0	24	0	0	0	0	0	24	0	0	0	0	0	24	0	0	0	0	0
					36	0	0	0	0	0	36	0	0	0	0	0	36	0	0	0	0	0	36	0	0	0	0	0	36	0	0	0	0	0
					48	0	0	0	0	0	48	10	0	0	3.33333	5.7735	48	0	0	0	0	0	48	10	10	10	10	0	48	0	0	0	0	0
					60	10	20	30	20	10	60	10	10	10	10	0	60	20	20	20	20	0	60	10	10	10	10	0	60	0	0	0	0	0
					72	20	10	10	13.3333	5.7735	72	10	10	10	10	0	72	0	0	0	0	0	72	0	0	0	0	0	72	0	0	0	0	0
					84	10	10	10	10	0	84	10	10	20	13.3333	5.7735	84	0	10	10	6.66667	5.7735	84	10	10	10	10	0	84	0	0	0	0	0
					96	10	10	0	6.66667	5.7735	96	0	10	0	3.33333	5.7735	96	0	10	0	3.33333	5.7735	96	10	10	10	10	0	96	0	0	0	0	0
					108	0	0	10	3.33333	5.7735	108	0	0	0	0	0	108	0	0	0	0	0	108	10	0	10	6.66667	5.7735	108	0	0	0	0	0
					120	10	10	10	10	0	120	0	10	0	3.33333	5.7735	120	10	0	0	3.33333	5.7735	120	10	10	10	10	0	120	0	0	0	0	0
					132	10	0	10	6.66667	5.7735	132	10	10	20	13.3333	5.7735	132	0	0	10	3.33333	5.7735	132	10	10	0	6.66667	5.7735	132	0	0	0	0	0
					144	0	10	0	3.33333	5.7735	144	0	10	0	3.33333	5.7735	144	0	10	0	3.33333	5.7735	144	0	20	0	6.66667	11.547	144	0	0	0	0	0
					156	0	0	0	0	0	156	0	0	0	0	0	156	10	0	0	3.33333	5.7735	156	10	0	10	6.66667	5.7735	156	0	0	0	0	0
					168	0	0	0	0	0	168	10	0	0	3.33333	5.7735	168	0	0	0	0	0	168	0	10	20	10	10	168	0	0	0	0	0
					180	10	10	0	6.66667	5.7735	180	10	0	0	3.33333	5.7735	180	10	0	10	6.66667	5.7735	180	0	0	0	0	0	180	0	0	0	0	0
					192	10	0	0	3.33333	5.7735	192	10	0	0	3.33333	5.7735	192	0	0	0	0	0	192	10	0	0	3.33333	5.7735	192	0	0	0	0	0
					204	0	0	10	3.33333	5.7735	204	0	0	0	0	0	204	0	0	0	0	0	204	0	0	0	0	0	204	0	0	0	0	0
					216	0	10	0	3.33333	5.7735	216	0	0	0	0	0	216	0	0	10	3.33333	5.7735	216	0	0	0	0	0	216	0	0	0	0	0
					228	0	0	0	0	0	228	0	0	0	0	0	228	0	0	0	0	0	228	0	10	0	3.33333	5.7735	228	0	0	0	0	0
					240	0	10	0	3.33333	5.7735	240	0	0	0	0	0	240	0	0	0	0	0	240	0	0	0	0	0	240	0	0	0	0	0
					Σ	90	100	90	93.3333	5.7735	Σ	80	70	60	70	10	Σ	50	50	60	53.3333	5.7735	Σ	90	100	90	93.3333	5.7735	Σ	0	0	0	0	0
																										Final mortality rate	Final mortality rate/100	Arcsine
																								D1	R1	90	0.9	0.451027
																									R2	100	1	0
																									R3	90	0.9	0.451027
																								D4	R1	80	0.8	0.643501
																									R2	70	0.7	0.795399
																									R3	60	0.6	0.927295
																								D7	R1	50	0.5	1.0472
																									R2	50	0.5	1.0472
																									R3	60	0.6	0.927295
																								Ctrol (+)	R1	90	0.9	0.451027
																									R2	100	1	0
																									R3	90	0.9	0.451027
																								Ctrol (-)	R1	0	0	1.5708
																									R2	0	0	1.5708
																									R3	0	0	1.5708
