# Supplementary material for: Chronic toxicity of shrimp feed added with silver nanoparticles (Argovit-4®) in Litopenaeus vannamei and immune response to white spot syndrome virus infection
Source: PeerJ. 2022 Nov 22;10:e14231. doi: 10.7717/peerj.14231 (PMC9695493; doi:10.7717/peerj.14231)
Supplement: File S2 — Transcriptional response of experimental shrimp after experimental infection with WSSV and at 9 and 12 hours post-infection. Data are represented as the relative expression of each gene in all treatments. The data were analyzed by two-way ANOVA using the time and treatment factors. Tukey test was interpreted as differences between treatment each time and the difference between before and after infection. [file peerj-10-14231-s002.xlsx]

## Sheet: Expression data
	PAP					PEN-3					ProPO					CTL-3					Crustin					PEN-4
	Ctrol	D1	D4	D7		Ctrol	D1	D4	D7		Ctrol	D1	D4	D7		Ctrol	D1	D4	D7		Ctrol	D1	D4	D7	PEN4	Ctrol	D1	D4	D7
0h	0.830112	0.0587199	0.0678317	0.498948	0h	1.0693	0.836852	0.955395	0.983618	0h	0.820392	0.0618146	0.13025	0.517556	0h	1.1795	1.52466	1.39767	1.39392	0h	0.926567	0.241178	0.378913	0.679245	0h	1.17939	1.10996	1.14981	0.792864
	0.724299	0.100063	0.122714	0.542413		1.0504	0.984982	1.13969	0.843523		0.742744	0.105036	0.123608	0.540496		1.5385	1.40237	1.98107	2.14209		1.09934	0.46989	0.395685	0.998323		1.28556	1.39852	1.00787	0.81854
	1	0.0901005	0.101336	0.479128		1	0.779472	1.19041	1.22928		1	0.0949774	0.103426	0.48372		1	1.54203	1.23321	2.11347		0.981731	0.554827	0.400066	1.08227		1	1.10607	1.04961	1.07632
	1	0.0901005	0.101336	0.479128		1	0.779472	1.19041	1.22928		1	0.0949774	0.103426	0.48372		1	1.54203	1.23321	2.11347		1	0.397646	0.391448	0.902009		1	1.10607	1.04961	1.07632
6h	0.164708	0.368596	0.173439	0.275719	6h	0.720761	0.805213	0.753277	1.19185	6h	0.160957	0.400189	0.171234	0.278634	6h	1.9235	4.17952	3.06161	1.1961	6h	1.07531	1.06275	1.14398	1.29817	6h	2.77881	1.66367	2.03927	3.20704
	0.16163	0.395999	0.177417	0.332366		0.764195	0.80678	1.69736	1.4787		0.174268	0.410271	0.210463	0.213089		3.15987	6.20477	3.07318	1.55279		1.18204	1.43754	0.929773	1.32781		3.22217	1.73896	2.83612	3.3679
	0.194051	0.397626	0.10439	0.332515		0.683848	0.848719	1.37723	1.90803		0.194311	1.14536	0.184192	0.326698		3.58784	7.18643	2.4679	1.16276		1.07568	3.50972	1.01382	1.80794		2.67754	4.41187	2.85158	4.1779
	0.217754	0.312162	0.128995	0.282886		1.0158	0.760142	1.33918	1.41128		0.22596	0.651939	0.135371	0.279034		3.9631	3.82403	2.73846	1.36777		1.37678	1.85531	1.06256	1.40091		3.08122	2.17335	2.81915	3.67081
12h	0.0542736	0.0804257	0.0440102	0.0628328	12h	1.00811	0.959591	0.819137	0.14921	12h	0.0992154	0.0788177	0.0223405	0.00227103	12h	3.10075	1.26801	0.000160968	3.10293	12h	0.946629	0.928209	0.676561	0.260283	12h	1.05437	2.37488	0.046559	65.615
	0.065631	0.0584403	0.0532061	0.073893		0.907712	0.985722	1.13563	0.0548059		0.053144	0.0569366	0.0223405	0.000905311		2.27435	2.05512	0.0427474	3.14601		0.984642	1.02923	0.458698	0.322026		1.33622	2.33847	4.14687	31.2247
	0.0841886	0.0717781	0.0532061	0.200607		0.934919	0.938257	1.13563	0.0668684		0.06517	0.0734867	0.000425797	0.00108587		2.27323	1.70894	0.0427474	3.31857		0.89608	1.02142	0.512053	0.38889		1.93478	2.20319	4.14687	39.1738
	0.0407156	4.94268e-05	0.0388928	0.0814315		1.12325	0.96119	1.03013	0.0799728		0.0879741	0.069747	0.000499988	0.00085842		2.42071	1.67736	0.0285519	2.84422		0.954597	1.36137	0.187478	0.368373		1.56945	2.30551	2.7801	40.9452
	0h	6h	12h			0h	6h	12h			0h	6h	12h			0h	6h	12h			0h	6h	12h			0h	6h	12h
Ctrol	0.830112	0.164708	0.0542736		Ctrol	1.0693	0.720761	1.00811		Ctrol	0.820392	0.160957	0.0992154		Ctrol	1.1795	1.9235	3.10075		Ctrol	0.926567	1.07531	0.946629		Ctrol	1.17939	2.77881	1.05437
Ctrol	0.724299	0.16163	0.065631		Ctrol	1.0504	0.764195	0.907712		Ctrol	0.742744	0.174268	0.053144		Ctrol	1.5385	3.15987	2.27435		Ctrol	1.09934	1.18204	0.984642		Ctrol	1.28556	3.22217	1.33622
Ctrol	1	0.194051	0.0841886		Ctrol	1	0.683848	0.934919		Ctrol	1	0.194311	0.06517		Ctrol	1	3.58784	2.27323		Ctrol	0.981731	1.07568	0.89608		Ctrol	1	2.67754	1.93478
Ctrol	1	0.217754	0.0407156		Ctrol	1	1.0158	1.12325		Ctrol	1	0.22596	0.0879741		Ctrol	1	3.9631	2.42071		Ctrol	1	1.37678	0.954597		Ctrol	1	3.08122	1.56945
D1	0.0587199	0.368596	0.0804257		D1	0.836852	0.805213	0.959591		D1	0.0618146	0.400189	0.0788177		D1	1.52466	4.17952	1.26801		D1	0.241178	1.06275	0.928209		D1	1.10996	1.66367	2.37488
D1	0.100063	0.395999	0.0584403		D1	0.984982	0.80678	0.985722		D1	0.105036	0.410271	0.0569366		D1	1.40237	6.20477	2.05512		D1	0.46989	1.43754	1.02923		D1	1.39852	1.73896	2.33847
D1	0.0901005	0.397626	0.0717781		D1	0.779472	0.848719	0.938257		D1	0.0949774	1.14536	0.0734867		D1	1.54203	7.18643	1.70894		D1	0.554827	3.50972	1.02142		D1	1.10607	4.41187	2.20319
D1	0.0901005	0.312162	4.94268e-05		D1	0.779472	0.760142	0.96119		D1	0.0949774	0.651939	0.069747		D1	1.54203	3.82403	1.67736		D1	0.397646	1.85531	1.36137		D1	1.10607	2.17335	2.30551
D4	0.0678317	0.173439	0.0440102		D4	0.955395	0.753277	0.819137		D4	0.13025	0.171234	0.0223405		D4	1.39767	3.06161	0.000160968		D4	0.378913	1.14398	0.676561		D4	1.14981	2.03927	0.046559
D4	0.122714	0.177417	0.0532061		D4	1.13969	1.69736	1.13563		D4	0.123608	0.210463	0.0223405		D4	1.98107	3.07318	0.0427474		D4	0.395685	0.929773	0.458698		D4	1.00787	2.83612	4.14687
D4	0.101336	0.10439	0.0532061		D4	1.19041	1.37723	1.13563		D4	0.103426	0.184192	0.000425797		D4	1.23321	2.4679	0.0427474		D4	0.400066	1.01382	0.512053		D4	1.04961	2.85158	4.14687
D4	0.101336	0.128995	0.0388928		D4	1.19041	1.33918	1.03013		D4	0.103426	0.135371	0.000499988		D4	1.23321	2.73846	0.0285519		D4	0.391448	1.06256	0.187478		D4	1.04961	2.81915	2.7801
D7	0.498948	0.275719	0.0628328		D7	0.983618	1.19185	0.14921		D7	0.517556	0.278634	0.00227103		D7	1.39392	1.1961	3.10293		D7	0.679245	1.29817	0.260283		D7	0.792864	3.20704	65.615
D7	0.542413	0.332366	0.073893		D7	0.843523	1.4787	0.0548059		D7	0.540496	0.213089	0.000905311		D7	2.14209	1.55279	3.14601		D7	0.998323	1.32781	0.322026		D7	0.81854	3.3679	31.2247
D7	0.479128	0.332515	0.200607		D7	1.22928	1.90803	0.0668684		D7	0.48372	0.326698	0.00108587		D7	2.11347	1.16276	3.31857		D7	1.08227	1.80794	0.38889		D7	1.07632	4.1779	39.1738
D7	0.479128	0.282886	0.0814315		D7	1.22928	1.41128	0.0799728		D7	0.48372	0.279034	0.00085842		D7	2.11347	1.36777	2.84422		D7	0.902009	1.40091	0.368373		D7	1.07632	3.67081	40.9452
Time	Treatment	PAP	PEN3	ProPO	CTL-3	Crustin	PEN4
0h	Ctrol	0.830112	1.0693	0.820392	1.1795	0.926567	1.17939
0h	Ctrol	0.724299	1.0504	0.742744	1.5385	1.09934	1.28556
0h	Ctrol	1	1	1	1	0.981731	1
0h	Ctrol	1	1	1	1	1	1
0h	D1	0.0587199	0.836852	0.0618146	1.52466	0.241178	1.10996
0h	D1	0.100063	0.984982	0.105036	1.40237	0.46989	1.39852
0h	D1	0.0901005	0.779472	0.0949774	1.54203	0.554827	1.10607
0h	D1	0.0901005	0.779472	0.0949774	1.54203	0.397646	1.10607
0h	D4	0.0678317	0.955395	0.13025	1.39767	0.378913	1.14981
0h	D4	0.122714	1.13969	0.123608	1.98107	0.395685	1.00787
0h	D4	0.101336	1.19041	0.103426	1.23321	0.400066	1.04961
0h	D4	0.101336	1.19041	0.103426	1.23321	0.391448	1.04961
0h	D7	0.498948	0.983618	0.517556	1.39392	0.679245	0.792864
0h	D7	0.542413	0.843523	0.540496	2.14209	0.998323	0.81854
0h	D7	0.479128	1.22928	0.48372	2.11347	1.08227	1.07632
0h	D7	0.479128	1.22928	0.48372	2.11347	0.902009	1.07632
6h	Ctrol	0.164708	0.720761	0.160957	1.9235	1.07531	2.77881
6h	Ctrol	0.16163	0.764195	0.174268	3.15987	1.18204	3.22217
6h	Ctrol	0.194051	0.683848	0.194311	3.58784	1.07568	2.67754
6h	Ctrol	0.217754	1.0158	0.22596	3.9631	1.37678	3.08122
6h	D1	0.368596	0.805213	0.400189	4.17952	1.06275	1.66367
6h	D1	0.395999	0.80678	0.410271	6.20477	1.43754	1.73896
6h	D1	0.397626	0.848719	1.14536	7.18643	3.50972	4.41187
6h	D1	0.312162	0.760142	0.651939	3.82403	1.85531	2.17335
6h	D4	0.173439	0.753277	0.171234	3.06161	1.14398	2.03927
6h	D4	0.177417	1.69736	0.210463	3.07318	0.929773	2.83612
6h	D4	0.10439	1.37723	0.184192	2.4679	1.01382	2.85158
6h	D4	0.128995	1.33918	0.135371	2.73846	1.06256	2.81915
6h	D7	0.275719	1.19185	0.278634	1.1961	1.29817	3.20704
6h	D7	0.332366	1.4787	0.213089	1.55279	1.32781	3.3679
6h	D7	0.332515	1.90803	0.326698	1.16276	1.80794	4.1779
6h	D7	0.282886	1.41128	0.279034	1.36777	1.40091	3.67081
12h	Ctrol	0.0542736	1.00811	0.0992154	3.10075	0.946629	1.05437
12h	Ctrol	0.065631	0.907712	0.053144	2.27435	0.984642	1.33622
12h	Ctrol	0.0841886	0.934919	0.06517	2.27323	0.89608	1.93478
12h	Ctrol	0.0407156	1.12325	0.0879741	2.42071	0.954597	1.56945
12h	D1	0.0804257	0.959591	0.0788177	1.26801	0.928209	2.37488
12h	D1	0.0584403	0.985722	0.0569366	2.05512	1.02923	2.33847
12h	D1	0.0717781	0.938257	0.0734867	1.70894	1.02142	2.20319
12h	D1	4.94268e-05	0.96119	0.069747	1.67736	1.36137	2.30551
12h	D4	0.0440102	0.819137	0.0223405	0.000160968	0.676561	0.046559
12h	D4	0.0532061	1.13563	0.0223405	0.0427474	0.458698	4.14687
12h	D4	0.0532061	1.13563	0.000425797	0.0427474	0.512053	4.14687
12h	D4	0.0388928	1.03013	0.000499988	0.0285519	0.187478	2.7801
12h	D7	0.0628328	0.14921	0.00227103	3.10293	0.260283	65.615
12h	D7	0.073893	0.0548059	0.000905311	3.14601	0.322026	31.2247
12h	D7	0.200607	0.0668684	0.00108587	3.31857	0.38889	39.1738
12h	D7	0.0814315	0.0799728	0.00085842	2.84422	0.368373	40.9452
